# Supplementary material for: What the hippocampus tells the HPA axis: Hippocampal output attenuates acute stress responses via disynaptic inhibition of CRF+ PVN neurons
Source: PubMed Central journal article supplement (PMC9379952; doi:10.1016/j.ynstr.2022.100473), 2022-08-05

# Supplemental Figure 1

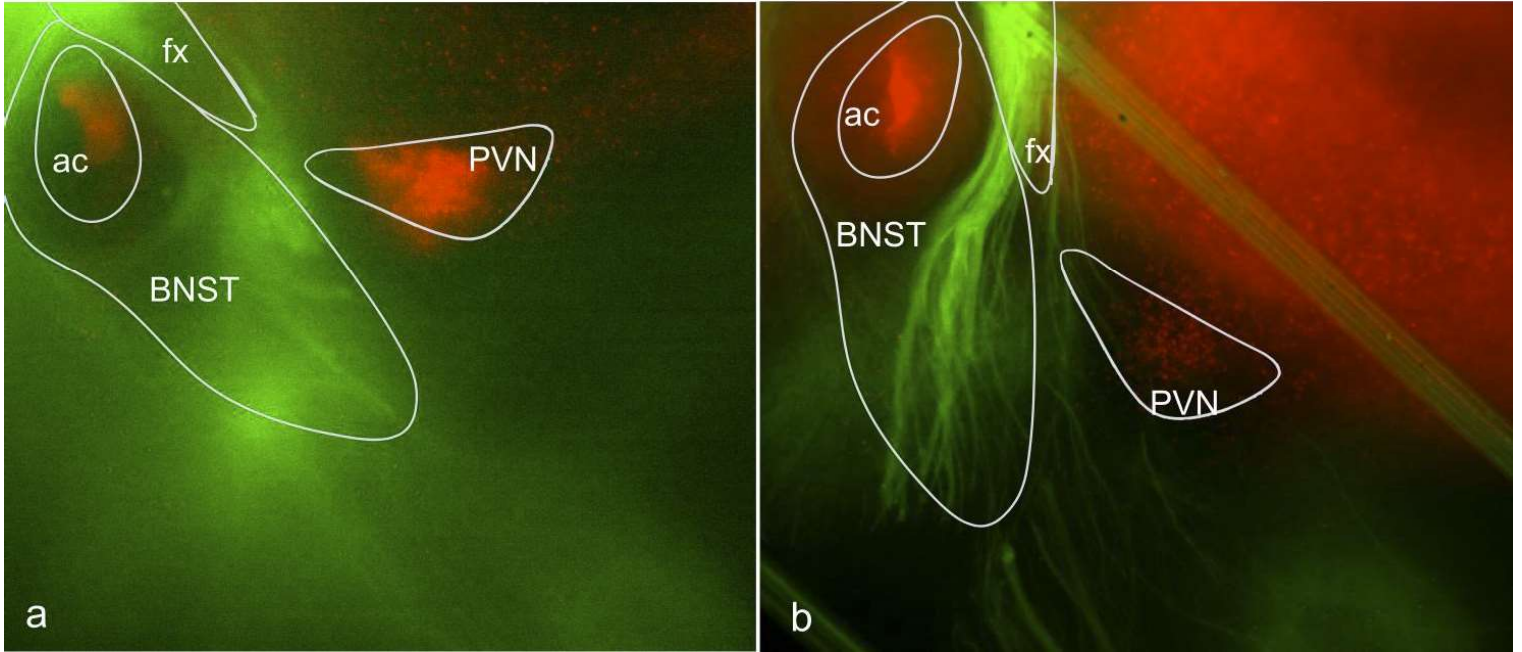

Supplement: mmc1.pdf [file mmc1.pdf]
